# Supplementary material for: Impact of Renal Denervation on Circadian Variations of Blood Pressure and Clock Gene Expression in Spontaneously Hypertensive Rats
Source: Research Square preprint supplement (doi:10.21203/rs.3.rs-6164221/v1), 2025-03-24

The original gel of ACE1, ACE2, AT1R , MasR and GAPDH in Figure 3.

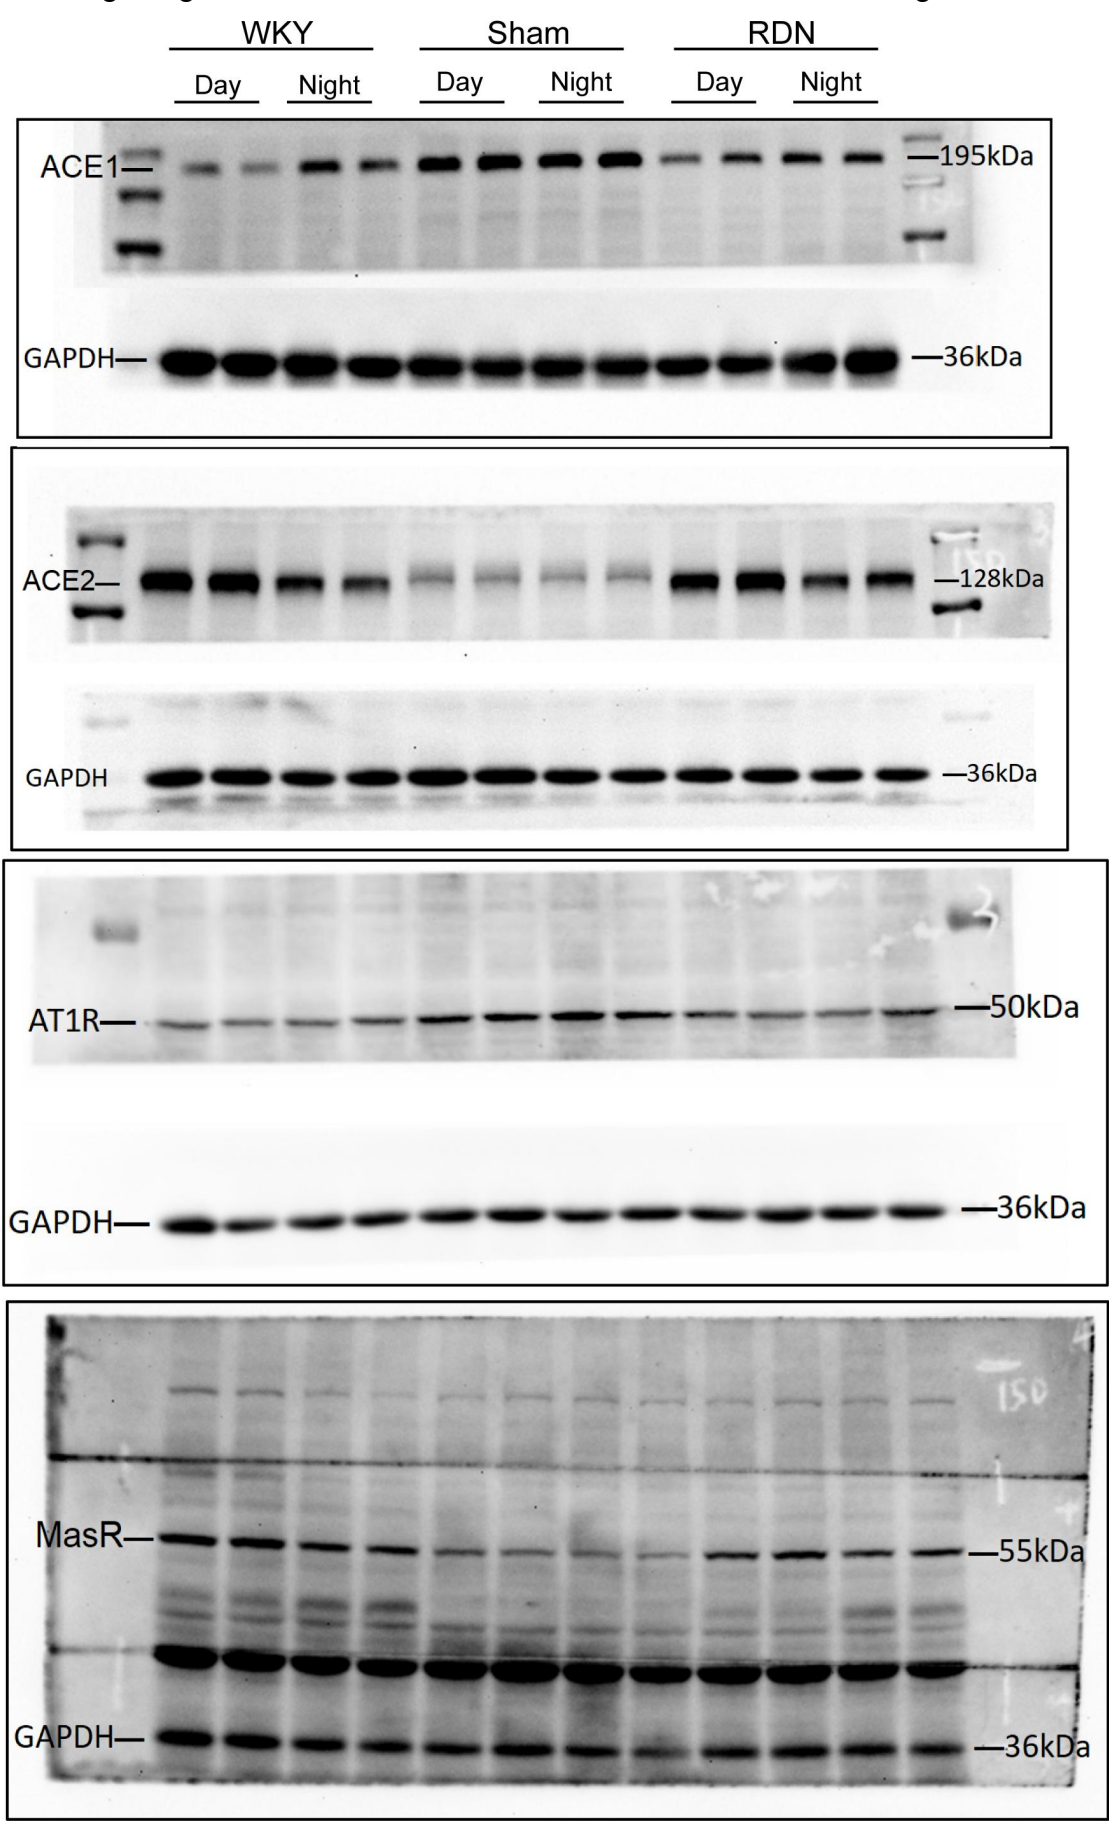

The original gel of Bmal1 and GAPDH in Figure 4.

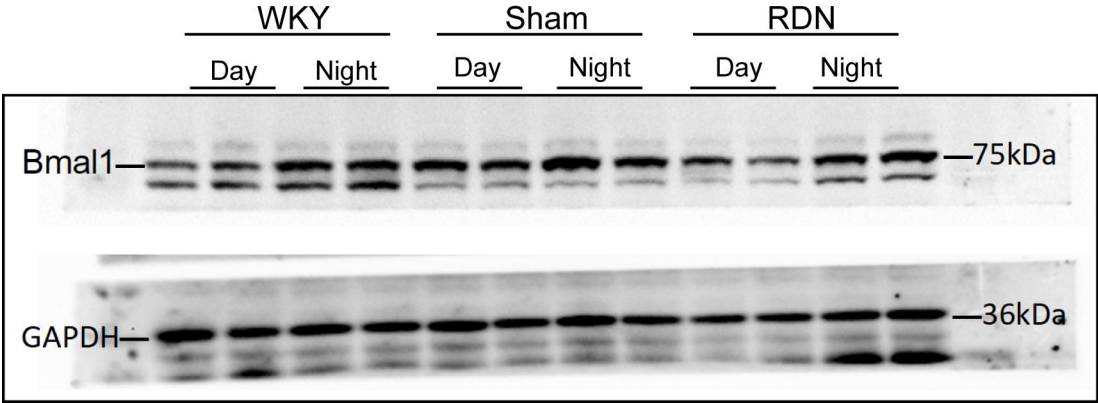

Supplement: Supplementary file 1 [file 9d3e18c68a095484cceb4dee.pdf]
